# Supplementary material
Source: PubMed Central journal article supplement (PMC4536132)
Supplement: NIHMS704994-supplement.pdf [file NIHMS704994-supplement.pdf]

# Supplemental Data

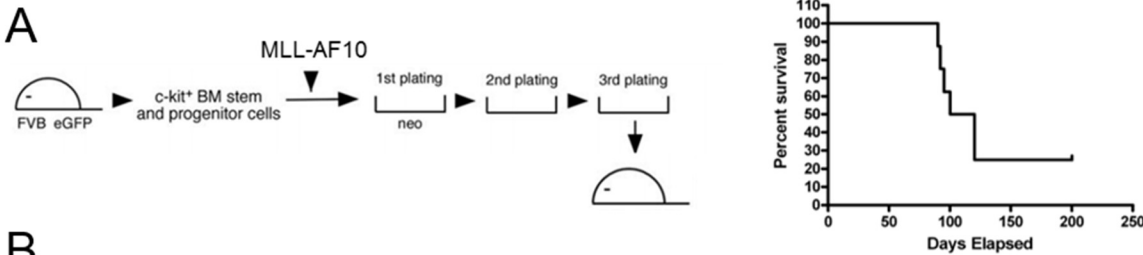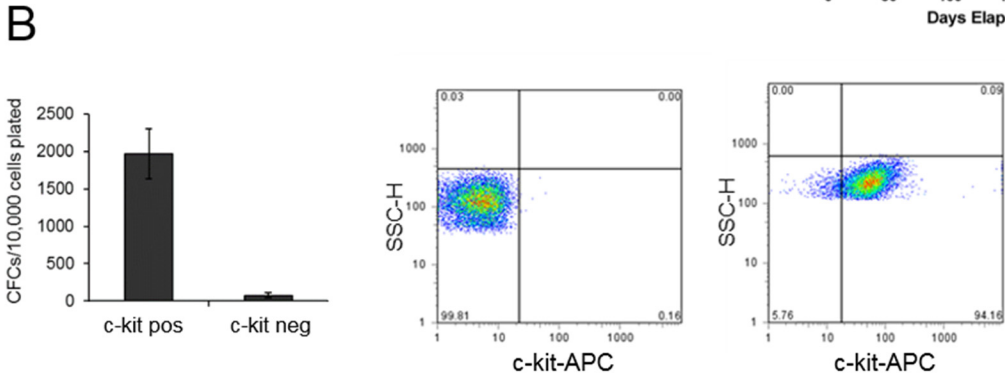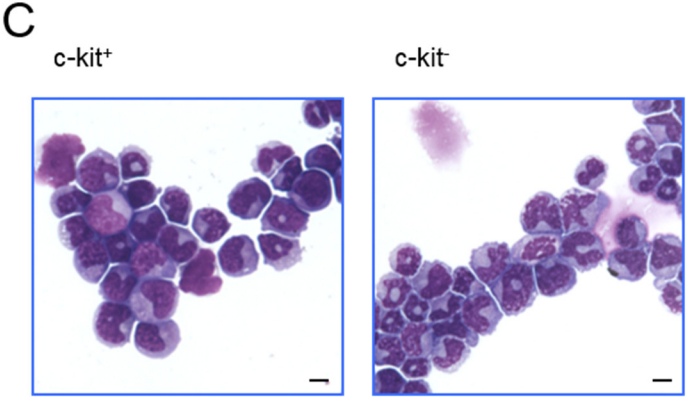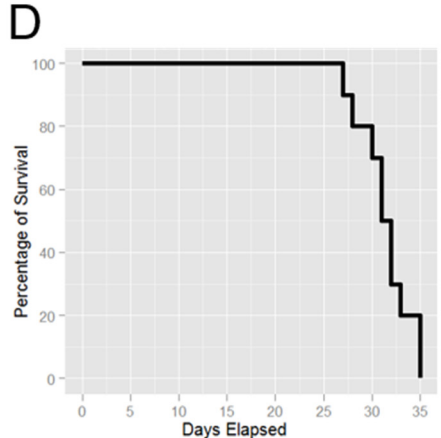

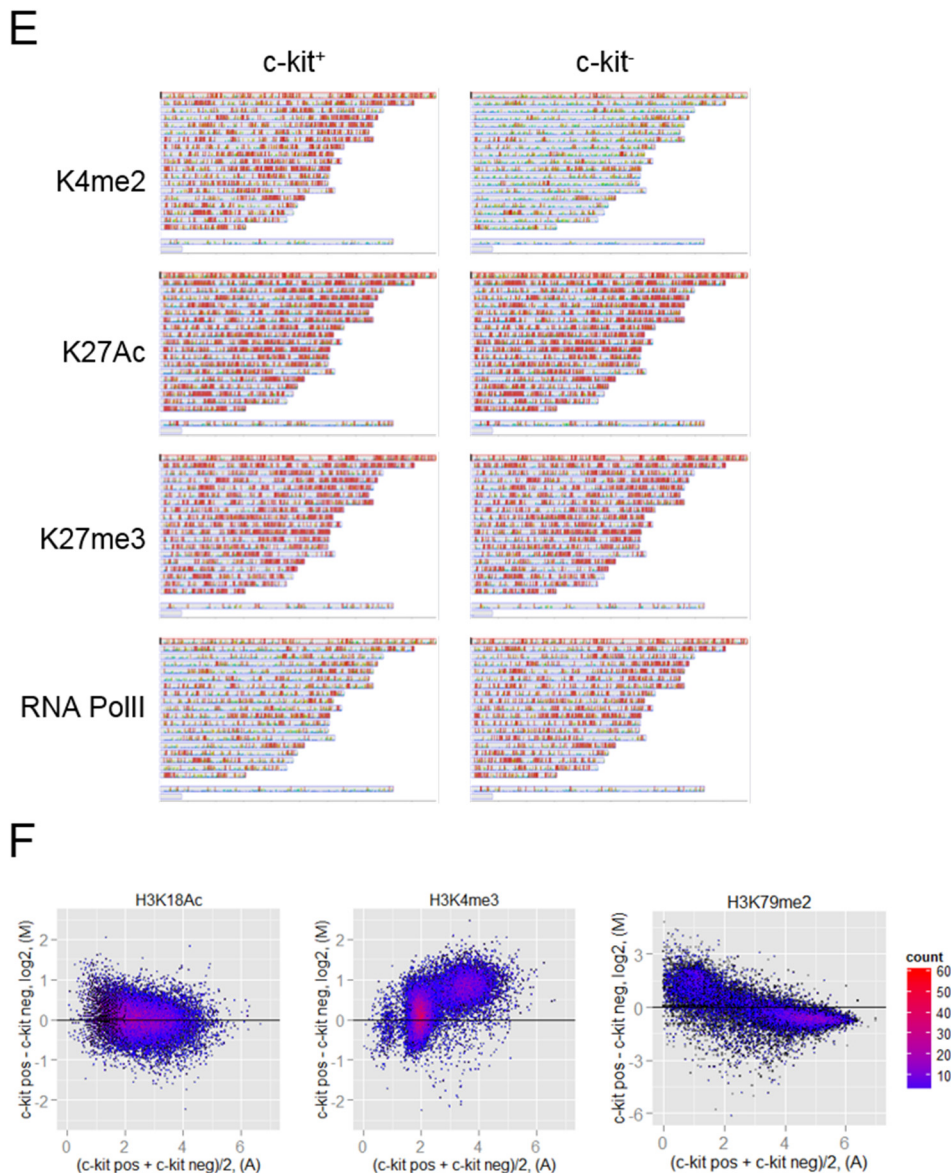

**Figure S1, related to Figure 1. Isolation of LSCs and analysis of ChIP-seq densities for histone modifications.**

(A) AML was induced by MLL-AF10 using a murine bone marrow transduction and transplantation protocol. Survival of transplanted mice is indicated on the right.

(B) Bar graph displays clonogenic cell frequencies, which correlate with LSC-depleted (c-kit<sup>-</sup>) or LSC-enriched (c-kit<sup>+</sup>) sub-populations shown in the FACs profiles. Error bars represent SEM.

(C) Cytologic images demonstrate that the c-kit<sup>+</sup> sub-population consists of progenitors while the c-kit<sup>-</sup> sub-population is comprised of differentiated cells. Scale bars represent 10  $\mu$ m.

(D) Single colonies generated from plated c-kit<sup>+</sup> AML cells were transplanted into secondary recipient mice to confirm their leukemogenic potential (n=10).

(E) Individual genes with ChIP-seq normalized read density signal encompassing the same genomic regions as in Figure 1 are plotted for H3K4me2, H3K27Ac, H3K27me3 and RNA Pol II.

(F) M-A plots display the distribution (log<sub>2</sub> difference) between ChIP density signals in each genomic region for various histone modifications in c-kit<sup>+</sup> versus c-kit<sup>-</sup> cells.

**Table S1, related to Figure 1. Summary of ChIP-seq results for various histone modifications and RNA Pol II.**

| Samples              | Total Reads | Mapped Reads (%) | Mapped Confidently (%) | No. of genes called | FDR   |
|----------------------|-------------|------------------|------------------------|---------------------|-------|
| H3K18Ac c-kit pos    | 22,796,494  | 72.19            | 62.61                  | 5679                | 0.15% |
| H3K18Ac c-kit neg    | 17,856,936  | 80.37            | 68.09                  | 5167                | 0.93% |
| H3K27Ac c-kit pos    | 18,287,037  | 77.96            | 65.25                  | 7899                | 0.00% |
| H3K27Ac c-kit neg    | 19,419,676  | 73               | 61.52                  | 7838                | 0.00% |
| H3K4me2 c-kit pos    | 17,300,370  | 71.89            | 63.38                  | 12108               | 0.00% |
| H3K4me2 c-kit neg    | 20,210,880  | 69.01            | 58.27                  | 8273                | 0.00% |
| H3K4me3 c-kit pos    | 40,811,561  | 89.61            | 71.94                  | 9858                | 0.03% |
| H3K4me3 c-kit neg    | 37,140,441  | 95.17            | 74.15                  | 5888                | 0.12% |
| H3K27me3 c-kit pos   | 15,829,527  | 93.92            | 80.54                  | 4288                | 0.00% |
| H3K27me3 c-kit neg   | 39,571,181  | 92.21            | 78.63                  | 4213                | 0.00% |
| H3K36me3 c-kit pos   | 38,250,451  | 95.75            | 84.04                  | 2066                | 2.64% |
| H3K36me3 c-kit neg   | 12,379,293  | 82.3             | 71.19                  | 1832                | 3.13% |
| H3K79me2 c-kit pos   | 21,507,460  | 77.58            | 69.07                  | 6017                | 2.65% |
| H3K79me2 c-kit neg   | 23,214,170  | 76.36            | 70.27                  | 7909                | 2.31% |
| RNA Pol II c-kit pos | 17,458,633  | 54.26            | 45.52                  | 6035                | 0.00% |
| RNA Pol II c-kit neg | 19,285,362  | 71.14            | 59.24                  | 7345                | 0.00% |

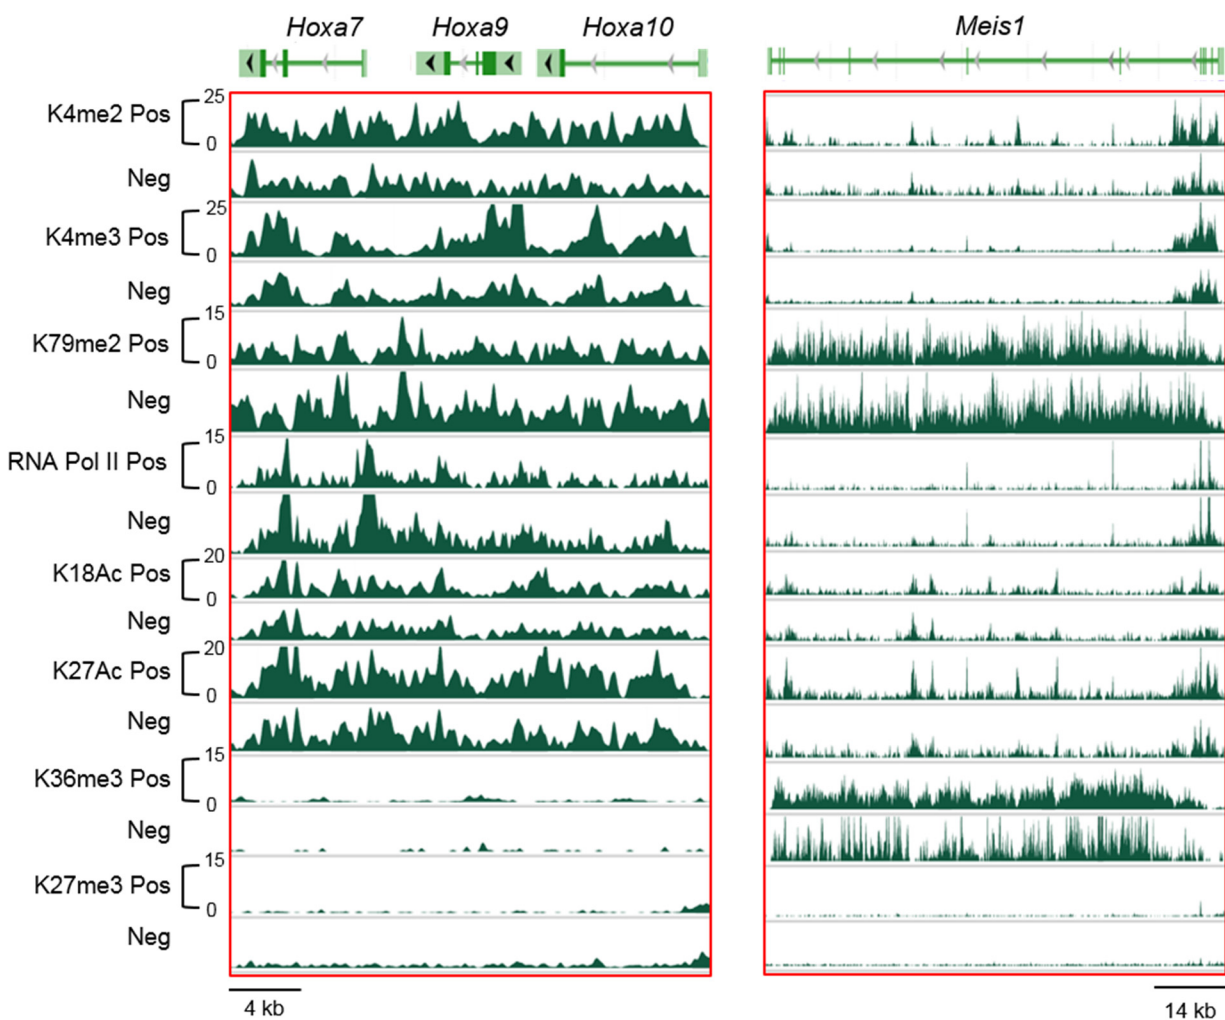

**Figure S2, related to Figure 2. Occupation of histone modifications and RNA Pol II on *Hoxa* and *Meis1* genes.**

Normalized ChIP binding regions are displayed for the indicated histone modifications and RNA Pol II on the *Hoxa* and *Meis1* genes in c-kit<sup>+</sup> and c-kit<sup>-</sup> AML cells. The y-axis scale represents normalized read density where c-kit<sup>+</sup> and c-kit<sup>-</sup> cells for individual histone marks use the same scale.

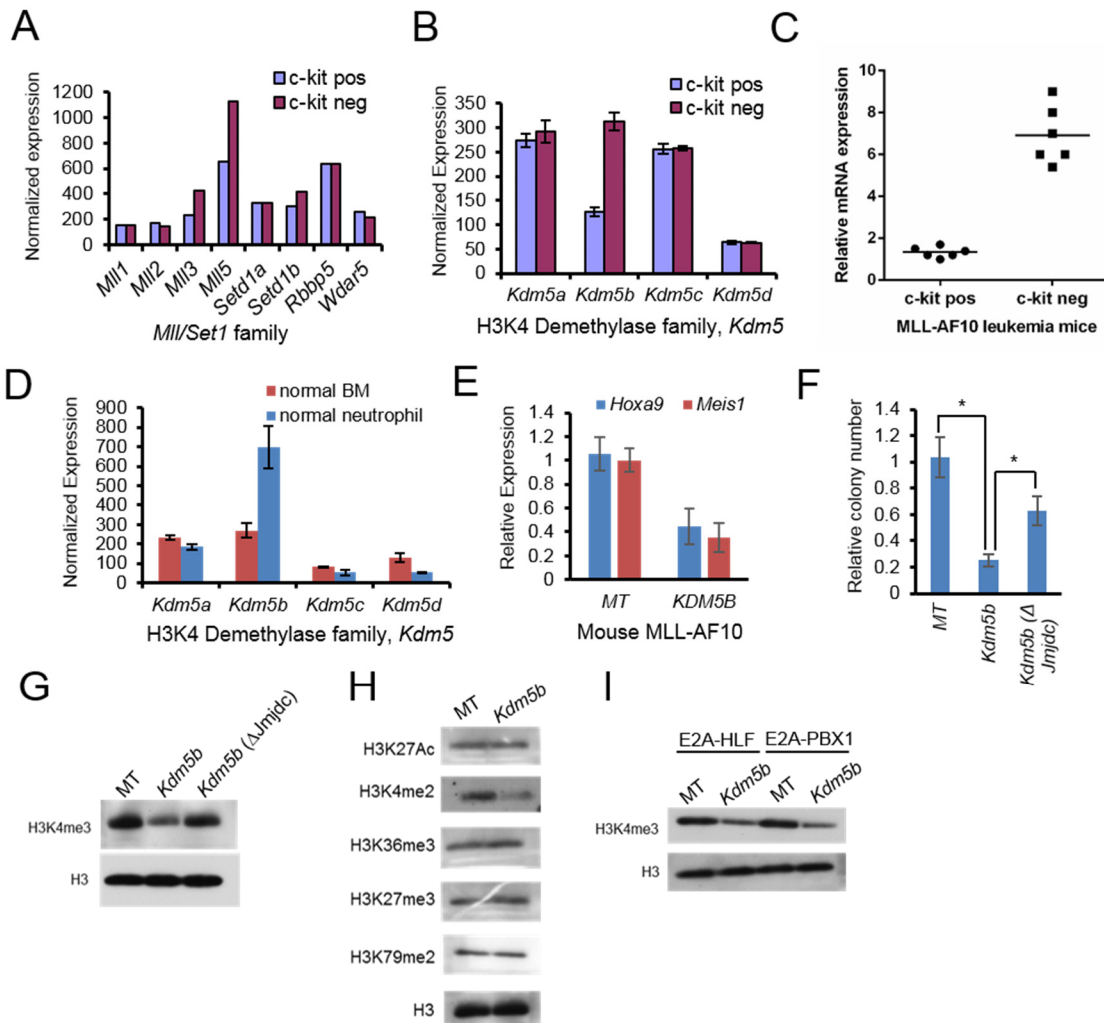

**Figure S3, related to Figure 4. Expression of H3K4 methyltransferases and demethylases in AML subpopulations.**

(A, B) Bar graphs indicate transcript levels for MLL/SET1 family of histone lysine 4 methyltransferases (A) and KDM5 family of histone lysine demethylases (B) in LSC-enriched (c-kit<sup>+</sup>) and depleted (c-kit<sup>-</sup>) AML cell sub-populations (data extracted from Somerville et al., 2009). (C) Plot indicates transcript levels for *Kdm5b* determined by RT-PCR in the indicated AML cell subpopulations. Horizontal bars indicate mean.

(D) Bar graph indicates transcript levels for *Kdm5* gene family members in the indicated normal hematopoietic cells (data extracted from Somerville et al., 2009).

(E) Bar graph indicates *Hoxa9* and *Meis1* transcript levels in mouse MLL-AF10 leukemia cells following *Kdm5b* overexpression.

(F) Bar graph indicates relative colony numbers generated by AML cells overexpressing wild type *Kdm5b* or a mutant lacking the demethylase domain. \*,  $p \leq 0.01$ .

(G) Western blot shows the level of global H3K4me3 for cells used in (E).

(H) Western blot shows the levels of indicated histone modifications in MLL-AF10 cells overexpressing *Kdm5b* compared with control empty vector (MT).

(I) Western blot shows the level of H3K4me3 in E2A-HLF and E2A-PBX mouse immortalized cells overexpressing *Kdm5b* compared with control empty vector (MT).

Errors bars represent SEM.

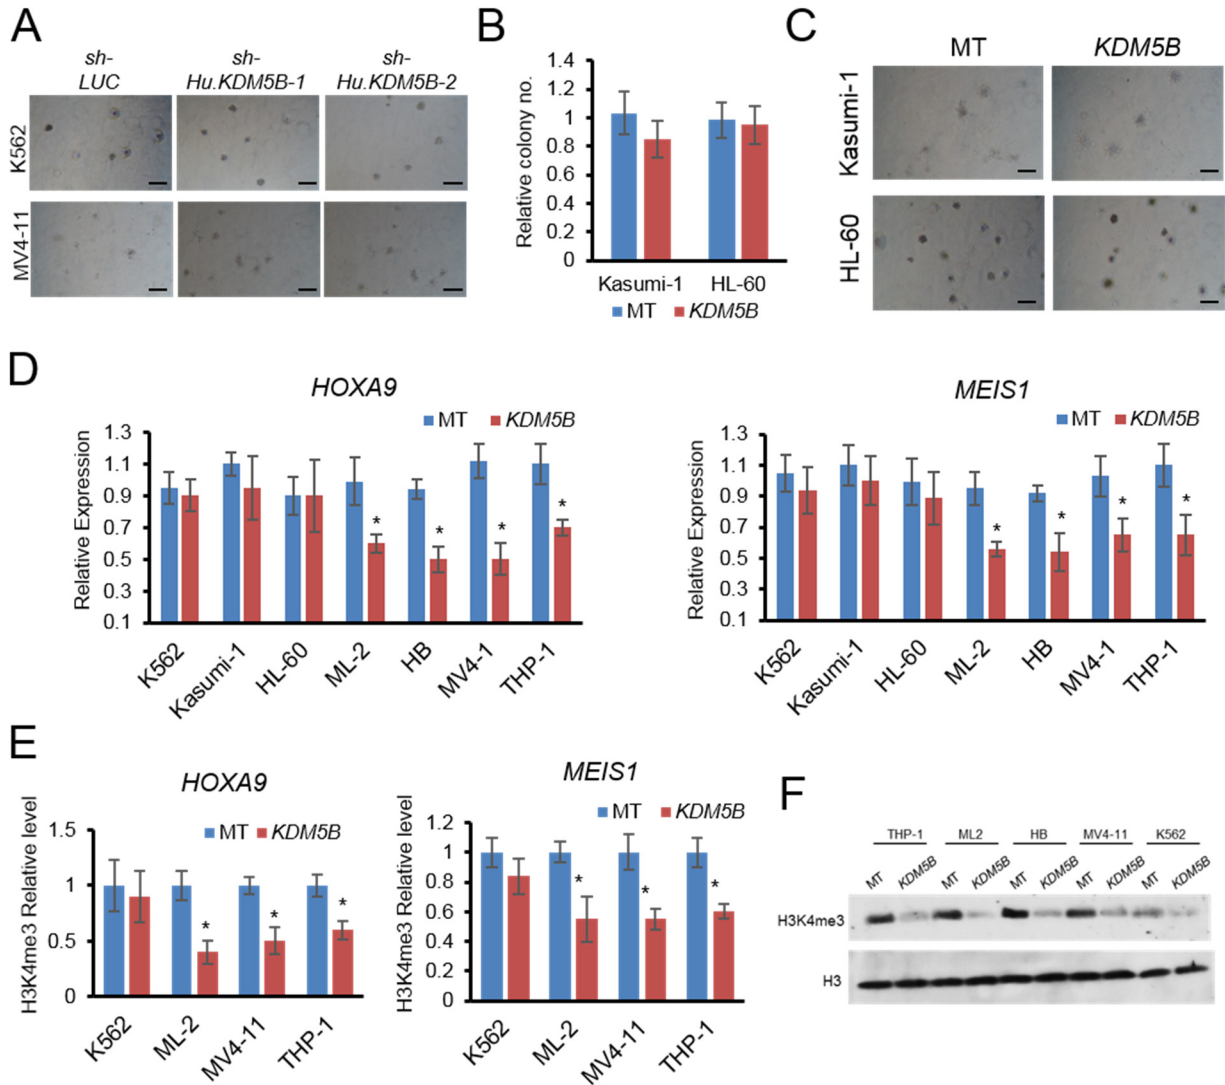

**Figure S4, related to Figure 6. Effect of KDM5B over-expression on *HOXA9* and *MEIS1* gene expression and H3K4me3 levels in human AML cell lines.**

(A) Images show colony morphologies of knockdown cells related to Figure 6C. Scale bars represent 20  $\mu$ m.

(B) Bar graph shows clonogenic cell frequencies for human non-MLLr cell lines Kasumi-1 and HL-60 overexpressing *KDM5B* versus control empty vector (MT).

(C) Images show colony morphologies of Kasumi-1 and HL-60 cells transduced with *KDM5B* overexpression or MT control vectors. Scale bars represent 20  $\mu$ m.

(D) Bar graphs indicate *HOXA9* and *MEIS1* transcript levels in human MLLr and non-MLLr cell lines following *KDM5B* overexpression. \*,  $p \leq 0.01$  for *KDM5B* vs. MT control.

(E) Bar graphs show results of ChIP assays for H3K4me3 levels near the TSS of *HOXA9* and *MEIS1* genes in the indicated human cell lines following *KDM5B* overexpression. \*,  $p \leq 0.01$  for *KDM5B* vs. MT control.

(F) Western blot shows H3K4me3 levels in human MLLr and K562 cell lines overexpressing *KDM5B* or empty control vector (MT). Error bars represent SEM.



## Supplemental Experimental Procedures

Primer sequences used in ChIP analyses.

| Top 50 genes in LSCs Pos program | Primer Forward          | Primer Reverse           |
|----------------------------------|-------------------------|--------------------------|
| SLC16A1                          | TGGTCGGTCGTGTAGGT       | GGACTAACCGTTATGTGTGTCT   |
| SERF1                            | CCACCCCTTCTGTCTTGTAG    | CCTCCTTACTTAGCAGCCTTAC   |
| TMEM180                          | CCACACCTTCCTCCTTTCTC    | GGAGCAGAGCGCCTTAAATA     |
| HMGB3                            | GCGGGTTGTTCTGTTTGAATG   | CTGCAGGCCCTCATGCATATTA   |
| RAD1                             | GTTAAGTCATCCGGCTCCAA    | GTTCAGATACGCAACCACCTA    |
| 1110004E09RIK                    | CTGAGTTCACATCAGCTACG    | CCATGTCTTTCTGTCCCTTAC    |
| ACP6                             | CGAAGTCTCAGGACTCATTTC   | GGGATTCGGGTCCACATTT      |
| SUCLG2                           | TTCTTGGCCTTGTGTCTAATG   | GCAGTTGACCCGGATTGT       |
| HSDL2                            | GTCTTGTAGGATCTCGGTCTTG  | GAGTGACAGGCGAACTTTCT     |
| CENPP                            | CAGCGGGAGACTAGTTGTTATC  | CCTGCTAGGTGTACTTGGTATTG  |
| ANGPTL4                          | ATCCACAGCACCTACAACAG    | CAACTAGCTGGGCCCTTAAT     |
| PPAT                             | ATTACTCTACCGCCCTCCTAC   | CCAGCTGGTGAGATCCTATTTT   |
| TASP1                            | CCTGCTCGTTCTCCTTGTATT   | TCATTGCCTGTCTTGCTAGTG    |
| CBX5                             | GCTCAGCACTCGAAGAAATAGA  | GGATCTTGAGTGGTAGTTGAAGA  |
| EEF1E1                           | CAACAAGAGAAAGGCAGCATTAG | GAGGTGAACCACATCACTGAG    |
| ILF2                             | GGCCTCCATTGTTCCAGGATTA  | TTGTTCCCTCCGACTCCATTTT   |
| SMYD2                            | TGCAGATGGAAGATGACTAACC  | ATGTCTGTGAGGATGCTGTG     |
| NUDT19                           | GTCGCTAGACATGCTCAGTAAG  | GTCAGGCCAGGAAGTCATAAG    |
| MRPL50                           | TCCTCTGGCCTCAACCATTATT  | CATGGGCGATTGCATTTATTCT   |
| DTYMK                            | GCTTGGAAACATGGGACCTAATA | TATCTCACGAGCTTTGTTCTG    |
| RRS1                             | GACAACCCGGAAGTGATCTT    | ACTACAGCAGCACCCCTAAC     |
| USP14                            | TCACTGTCCAAAGGAACTCATC  | AATGCTAAGCAGTCAAGGATCT   |
| RRP15                            | CGCTCAATACCTACTTCCCTTAC | GCTGTGTGATTTCTCCACTAT    |
| DTD1                             | AATCTGTGACCGGAGGATTG    | TCTGCTCCAGTTTCTTCTCTT    |
| 4930579G24RIK                    | GTGGAAGTGAATCCTGACCATAG | CAGGAGGCCACCAGGAATAAAG   |
| RFC4                             | AAGTTTGACTCCCACTACCG    | TTCTTTGACCTCAGCCAAAG     |
| COASY                            | TAGGTGGTCTGGCCATTTATTT  | GCCTTTGTGCAACTGTGATG     |
| VKORC1                           | CTCAGAACAAGCACAGCAAAG   | AGCAGAGAGAGCTGCAAAG      |
| KDELR2                           | CCCGTCCCTATAGCCTTATTAC  | GGTCTCAGCTTCTTGGTCTTT    |
| DGCR6                            | GAAACCCCTGGAGAGCGAAAT   | GAGCAGCCGACTTTACAT       |
| 1500011K16RIK                    | GGAAGCAGGAACCAACAAG     | GGCGGACATTTCTAGCTACTT    |
| SEPHS1                           | TGTTTCCCTGGAGAACAACCT   | CCAGTCCTATCAAGTGACCAA    |
| TIMM8A1                          | AGTGCTGCTCGCAACTTT      | TGGCATCCGTTGCATGAT       |
| XRCC6                            | CACTGGGCACTTTCCCTTTA    | GCTAACACCTTAAGTCCCTGATAG |
| LAMP3                            | GCTCTTCTGGGTCAAGATACAA  | GGAACAGAAACGACTGGAAGA    |
| IDH3A                            | CATTGGCCAGATACCACTCTT   | AGTGCTGACATAGTTTCTTCTT   |
| PHKB                             | AGATGAAGGCGGTGATTGG     | CTAGCTCGGGTCTCTCGAT      |
| AGPAT5                           | GGGACTCATGGCTGAAGTAAG   | GTGGTCACAGGCAGTCAAA      |
| DRG1                             | AAACCCACCACCTCACTTC     | GCCGACTTATGGGCGTAATA     |
| RWDD4A                           | TGAGCAAGCAGAGAGGAAAG    | GGTCTCCATGGGTGTAACAATA   |
| ENY2                             | CGGAAAGAGAAGGAGCCAATAG  | CACCTAGACCTCTGACCAGTTA   |
| HDAC2                            | GTCTCTTCTGGGAAGTGTAGTG  | GTAAGGAAGTCCAGAGTCTGTTAG |
| FIGNL1                           | TCCGGGTCTCTGAGCAA       | GGGCGACAGTAGTGTCTCTAC    |
| MRPL18                           | CAGAGGATACTGGAAGGAACAC  | CCTCCTGAGCACTGCAATTA     |
| ETFB                             | GGACACCTTAAGCCCTTGATTA  | GGAAGGAGAACCAGACTGAAAG   |
| GTF2I                            | CTGAGACCGCAGCTATGAAC    | CGGGTCAAAGGGCAATAGAA     |
| ATAD3A                           | GTCTCCAACGCACGTAAGAT    | ACCCGATTCCCTGGTGTTTC     |
| MYB                              | TCTAGCACCAGATCCACTCTAC  | CCTCAGCTTCTGGACATTAC     |
| GAPDH                            | TTGCTACAAGGCAGTAGATACAC | GGGCTTCAGGGAAGACAAATA    |
| Actb                             | GGGTGCAGCGAACTTTATTG    | TCTCCCTCACAAATTTCCATCC   |

Primer sequences used in qRT-PCR analyses.

| Top 50 genes in LSCs Pos program | Primer Forward          | Primer Reverse           |
|----------------------------------|-------------------------|--------------------------|
| SLC16A1                          | GCCTCAGGGAAGCCAATAAA    | GTTAAGGTGTGGAGTAAGACTATG |
| SERF1                            | TGGCCCGTGGAAATCAAA      | CTTTCTCTGAGAGGCAGTCAAG   |
| TMEM180                          | GGTGTCCACTGTCACCTCA     | GTTGAGATGAGGAGCGACATAG   |
| HMGB3                            | GCTGGGTGAGATGTGGAATAA   | TAGTCAGCAACATCCTTCTCATAC |
| RAD1                             | TTGGCGTTCTCACTCTAACTC   | GGACTGACCTTGCTCCTATTT    |
| 1110004E09RIK                    | GGTGCGGTGATGATCGTTTA    | TGCCTGAGTTCCTGACAAATC    |
| ACP6                             | GTGGAGGATATTCCTTCCTTTTC | CAGCAAGCACCAGTAGATT      |
| SUCLG2                           | GCTACCTGCGACATCATCTT    | TCATAGACTGGGCTTCCTTTAC   |
| HSDL2                            | GTCTTGAGGATCTCGTCTTG    | GAGTGACAGGCGAAGCTTTCT    |
| CENPP                            | CCTGCTAGGTGTACTTGGTATTG | CAGCGGGAGACTAGTTGTTATC   |
| ANGPTL4                          | CAACTAGCTGGGCCCTTAAT    | ATCCACAGCACCTACAACAG     |
| PPAT                             | GAGTCGCTTCACCACCAATAA   | CGAGGTAATCTGCAAGACAATC   |
| TASP1                            | GCACCATACTGGCTAGAGAATG  | GGCAAGGAAAGGTGAAGTATA    |
| CBX5                             | GTGCAGATACGTGAGCATAAGA  | CCCATAACACCACCACATACA    |
| EEF1E1                           | GCCTCCACCCTTTATAGTT     | TGCCTGATGTCTGGGTAATG     |
| ILF2                             | CAGCTAGAAGTCTCCCATTGT   | GTACTTGGTTGGGAGTGGTTAG   |
| SMYD2                            | GGGAGGTACAACCAAGGATAAG  | TGACATTGCGTGCATATC       |
| NUDT19                           | GAAATCGTGAAGGAAGCAAAG   | CCTAGGGTACACGTGCTTATTC   |
| MRPL50                           | CCCTAATGGGCAGAAAGTCTAAT | TCTCCACTCCTCTTCTTCTACTC  |
| DTYMK                            | GAGCTAGTTCTCAGCAGAAGAG  | TACAGCCAAGCAGTAGGTAAG    |
| RRS1                             | AAGAAGACCAACCTCGTGTG    | ACCTCGATCAGCCATTCTTTAG   |
| USP14                            | GTTTCTGCACATGGCCTTTC    | CTGTTGCAGGACTCTCATCAT    |
| RRP15                            | GTTGCAACACGACGGAATTATC  | CTTCGGAGAACGCTTCAGTATC   |
| DTD1                             | CAGTTGGAGGAGAGCAGATAAG  | CCATGTGTTCCAGTTCCTTCT    |
| 4930579G24RIK                    | TGCTTGAGTTGGGAGTTGAG    | GGCACTGGGATAAGGAAGTAAAG  |
| RFC4                             | CTGGAAGTATCTCGCTGTTTCA  | GATGTGATCGAGGTCTCCTTTC   |
| COASY                            | GAAGGAGCTGACCTTCCTAATC  | AAGAGTTCAGGCCAAAGAG      |
| VKORC1                           | GAGCCAGTACAACCTGTTAAA   | GCAGCTCTCCAGTTCATAATC    |
| KDEL2                            | CTCAACCAATCCAACAGCATATT | ACTCAGCACCAGTAGGATAGA    |
| DGCR6                            | GTCTACTGCATCCTGCCTTATC  | TGGAAACTGTCCCAATTCATCT   |
| 1500011K16RIK                    | CCTAGTACTCTGGTCAATGTTG  | GCGGTTTGGAGGCTGTATTA     |
| SEPHS1                           | GATGGAATCTCACCTTGGTACAG | GGCATTGACACAGCTCCTA      |
| TIMM8A1                          | CACTAGCCTTCTGTCTTCTC    | GGAGACCATCATGCACTTACC    |
| XRCC6                            | ATGGTCTCAAGGTAGAAGAGGA  | CTCGTGGCTGTCTGGTAATAAG   |
| LAMP3                            | CAGCTTGTCTTCTCCTTATG    | CTTGCTATCTGCTCCTGGTTG    |
| IDH3A                            | CCTAGTTCCTAGGCTACTCTT   | CAATCAGTGCTAGTCCCATCTC   |
| PHKB                             | CCGGATGCTCTGTGTATTT     | ATCTGTCTAGTGAGGAGTATCT   |
| AGPAT5                           | GGGTGTTCTGGTCAGTTATTT   | AGGGCAGCATCTGTGTATG      |
| DRG1                             | CTCCGCTGTATGGGTTCTAC    | CTGCAGCTTGCTTCTCATTTC    |
| RWDD4A                           | GGTCGAAGGGAACAGAGTTTAT  | GTACACAGTGAGGCACCTTATAG  |
| ENY2                             | CTGGTTCAGCATCTCTCCTTAC  | ACAGCCAAACCTCGTCATT      |
| HDAC2                            | GGTTGAGGGCCAGCTATAAA    | CAGGGAACGATGAGGAAGATAG   |
| FIGNL1                           | CCAAGGACAATAGTGGTGAGAA  | CGAGGTTCTAAAGTTGGAGAG    |
| MRPL18                           | GAGGTTCTCAGCTTAGTGTTT   | TGGAATGGCTGGGTCTTATC     |
| ETFB                             | CTACCATCTACAGCCACCAAAG  | AGTCTGGTTCCTTCCAAATG     |
| GTF2I                            | GTGGTCACTGATGGTGTGAA    | CTCCTTACCAGTTTCTTCTCC    |
| ATAD3A                           | CCTCGCCTTGAGAGGATATTG   | CACTCCTGAGGCTGGTTTATC    |
| MYB                              | GACAGGACAGCAGTAGTAAG    | AGCAGACCATCTCGCAATG      |
| GAPDH                            | GACAAGGGAAGAGGATGAGAAG  | GTCCGGTTGGGCAGATAAT      |
| Actb                             | AACAGCAACTCCCACTCTTC    | CCTGTTGCTGTAGCCGTATT     |
